# Supplementary material for: DCAF7 Acts as A Scaffold to Recruit USP10 for G3BP1 Deubiquitylation and Facilitates Chemoresistance and Metastasis in Nasopharyngeal Carcinoma
Source: PubMed Central journal article supplement (PMC11423104; doi:10.1002/advs.202403262), 2024-07-08
Supplement: ADVS-11-2403262-s001.pdf [file ADVS-11-2403262-s001.pdf]

## Supporting Information

for *Adv. Sci.*, DOI 10.1002/adv.202403262

DCAF7 Acts as A Scaffold to Recruit USP10 for G3BP1 Deubiquitylation and Facilitates Chemoresistance and Metastasis in Nasopharyngeal Carcinoma

*Qing-Jie Li, Xue-Liang Fang, Ying-Qin Li, Jia-Yi Lin, Cheng-Long Huang, Shi-Wei He, Sheng-Yan Huang, Jun-Yan Li, Sha Gong, Na Liu, Jun Ma, Yin Zhao\* and Ling-Long Tang\**

**Supporting information**

**DCAF7 Acts as A Scaffold to Recruit USP10 for G3BP1 Deubiquitylation and Facilitates Chemoresistance and Metastasis in Nasopharyngeal Carcinoma**

*Qing-Jie Li, Xue-Liang Fang, Ying-Qin Li, Jia-Yi Lin, Cheng-Long Huang, Shi-Wei He,*

*Sheng-Yan Huang, Jun-Yan Li, Sha Gong, Na Liu, Jun Ma, Yin Zhao<sup>\*</sup>, Ling-Long Tang<sup>\*</sup>*

## **Supplementary figures**

**Figure S1. DCAF7 is highly expressed in most of solid tumors and associated with poor prognosis**

**Figure S2. Overexpression of DCAF7 facilitates the cisplatin resistance of NPC cells**

**Figure S3. DCAF7 enhances NPC cell migration, invasion and EMT**

**Figure S4. Identification of hub proteins from the PPI network with the MCODE algorithm**

**Figure S5. Overexpression of DCAF7 prolongs the half-life of G3BP1**

**Figure S6. Overexpression of USP10 prolongs the half-life of G3BP1**

**Figure S7. Significant enhancement of cisplatin resistance and migratory and invasive capabilities in NPC cells expressing the G3BP1 K76R mutant**

**Figure S8. Both DCAF7 and USP10 are important positive regulators in the formation of cisplatin-induced SG-like structures**

**Figure S9. DCAF7 promotes NPC cisplatin resistance via G3BP1**

**Figure S10. Unprocessed immunoblots for indicated Figures panels**

## **Supplementary tables**

**Table S1. Mass spectrometry analysis results for the anti-FLAG (FLAG-tagged DCAF7) immunoprecipitation complex**

**Table S2. Correlations between DCAF7 expression levels and clinical features in Nasopharyngeal carcinoma patients**

**Table S3 List of primers used in this study**

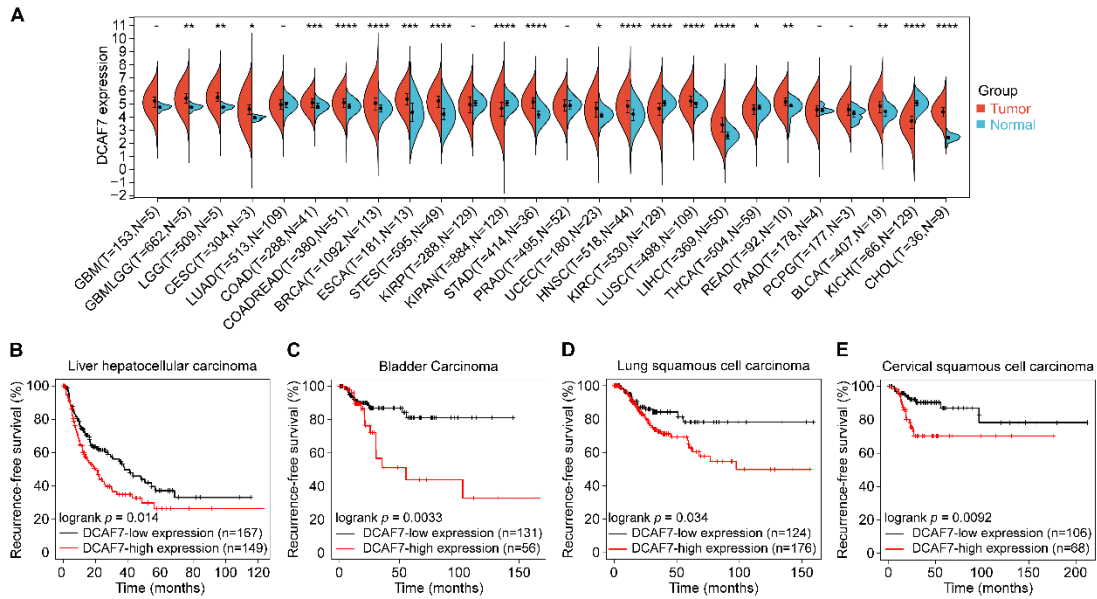

**Figure S1.** DCAF7 is highly expressed in most of solid tumors and associated with poor prognosis. A) The mRNA expression of DCAF7 in tumor and normal tissue samples was examined by analyzing TCGA database. GBM, glioblastoma multiforme; GBMLGG, glioma; LGG, brain lower grade glioma; CESC, cervical squamous cell carcinoma and endocervical adenocarcinoma; LUAD, lung adenocarcinoma; COAD, colon adenocarcinoma; COADREAD, colon adenocarcinoma/rectum adenocarcinoma esophageal carcinoma; BRCA, breast invasive carcinoma; ESCA, esophageal carcinoma; STES, stomach and esophageal carcinoma; KIRP, kidney renal papillary cell carcinoma; KIPAN, pan-kidney cohort (kidney chromophobe + kidney renal clear cell carcinoma + kidney renal papillary cell carcinoma); STAD, stomach adenocarcinoma; PRAD, prostate adenocarcinoma; UCEC, uterine corpus endometrial carcinoma; HNSC, head and neck squamous cell carcinoma; KIRC, kidney renal clear cell carcinoma; LUSC, lung squamous cell carcinoma; LIHC, liver hepatocellular carcinoma; THCA, thyroid carcinoma; READ, rectum adenocarcinoma; PAAD, pancreatic adenocarcinoma; PCPG, pheochromocytoma and paraganglioma; BLCA, bladder urothelial carcinoma; KICH, kidney chromophobe; CHOL, cholangiocarcinoma. Unpaired Wilcoxon Rank Sum and Signed Rank Tests were used,  $*P < 0.05$ ,  $**P < 0.01$ ,  $***P < 0.001$ , and  $****P < 0.0001$ . B-E) Survival analysis of DCAF7 in TCGA dataset.

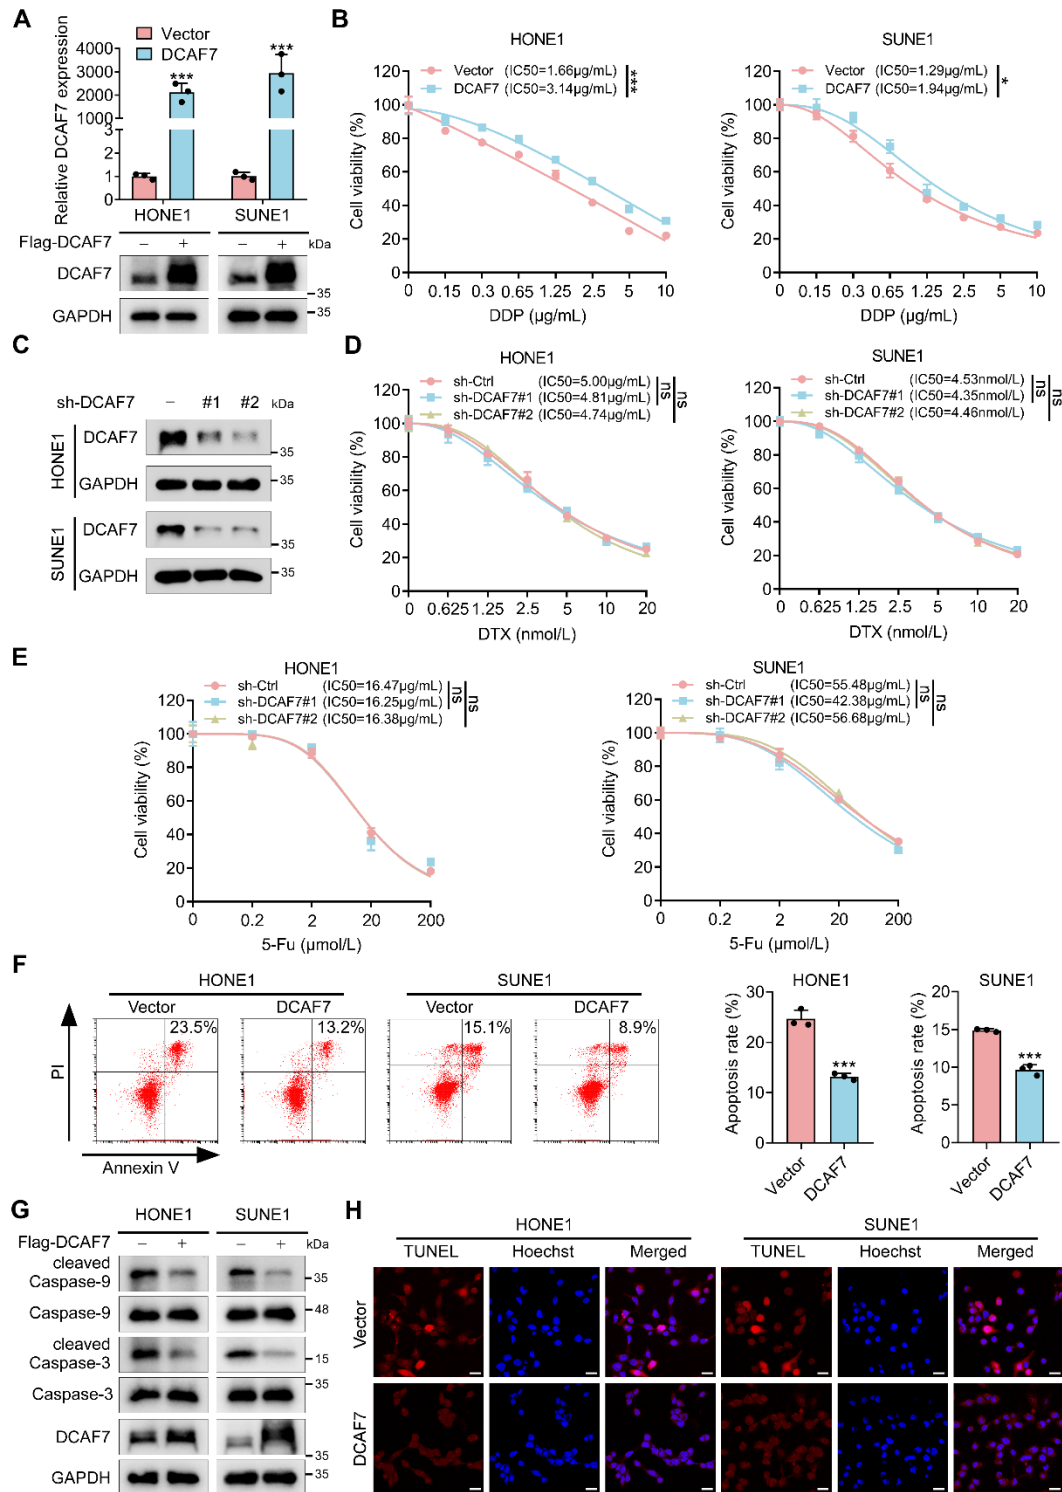

**Figure S2.** Overexpression of DCAF7 facilitates the cisplatin resistance of NPC cells.

A) The efficiency of DCAF7 overexpression was assessed using RT-qPCR and western blotting assays in HONE1 and SUNE1 cells. Mean ( $n = 3$ )  $\pm$  s.d. Student's t-test, \*\*\*  $P < 0.001$ . B) HONE1 or SUNE1 cells were subjected to indicated doses of cisplatin for 48 h, and the NPC cell viability was evaluated using CCK-8. Mean ( $n = 4$ )  $\pm$  s.d. Two-

way ANOVA, \*  $P < 0.05$ , \*\*\*  $P < 0.001$ . C) The DCAF7 knockdown efficiency was assessed using western blotting. D, E) A CCK-8 assay was used to evaluate docetaxel (D) and 5-fluorouracil (E) resistance in transfected NPC cells following treatment with the indicated concentrations of cisplatin for 48 h. Mean ( $n = 4$ )  $\pm$  s.d. Two-way ANOVA, ns  $P > 0.05$ . F) HONE1 or SUNE1 cells with DCAF7-overexpression were treated with cisplatin (2.5  $\mu\text{g}/\text{mL}$ ) for 24 h, and Annexin-V/PI analysis was conducted using flow cytometry. Mean ( $n = 3$ )  $\pm$  s.d. Student's t-test, \*\*\*  $P < 0.001$ . G) Western blotting assays (anti-cleaved Caspase3/9, Caspase3/9, anti-GAPDH or anti-DCAF7) in DCAF7-overexpressing HONE1 and SUNE1 cells following treatment with cisplatin (10  $\mu\text{g}/\text{mL}$ ) for 24 h. H) HONE1 or SUNE1 cells were treated with 10  $\mu\text{g}/\text{mL}$  cisplatin for 24 h and then subjected to TUNEL staining. Scale bars = 20  $\mu\text{m}$ . The unprocessed images of the blots are shown in Figure S10.

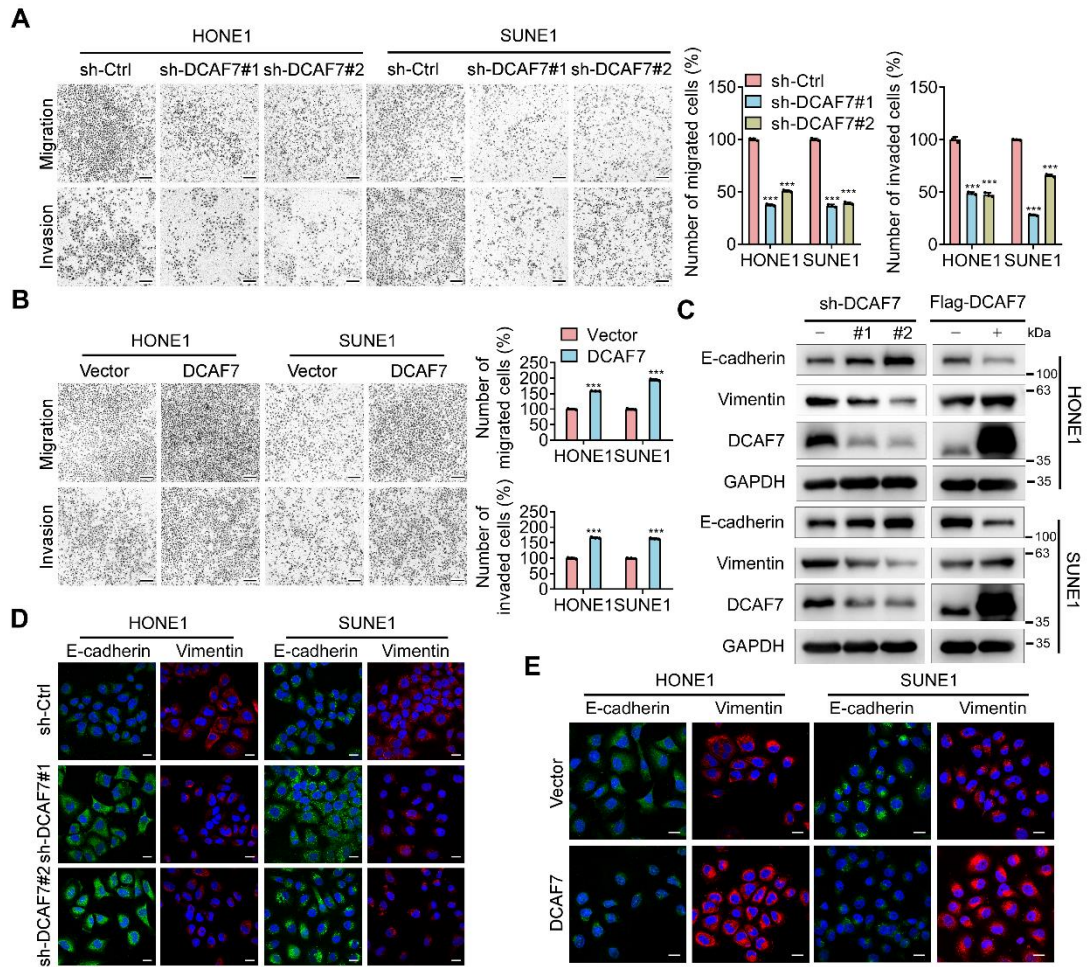

**Figure S3.** DCAF7 enhances NPC cell migration, invasion and EMT. A, B) Transwell assays were used to examine the impact of DCAF7 knockdown or overexpression on the migration and invasion of HONE1 and SUNE1 cells. The scale bars were set to 200  $\mu$ m. Mean ( $n = 3$ )  $\pm$  s.d. One-way ANOVA in A and Student's t-test in B were used, \*\*\*  $P < 0.001$ . C-E) E-cadherin and Vimentin levels were evaluated by western blotting (anti-GAPDH, anti-DCAF7, anti-Vimentin or anti-E-cadherin) and immunofluorescence staining (anti-Vimentin and anti-E-cadherin) in HONE1 and SUNE1 cells after DCAF7 overexpression or knockdown. The scale bars were set to 20  $\mu$ m. The unprocessed images of the blots are shown in Figure S10.

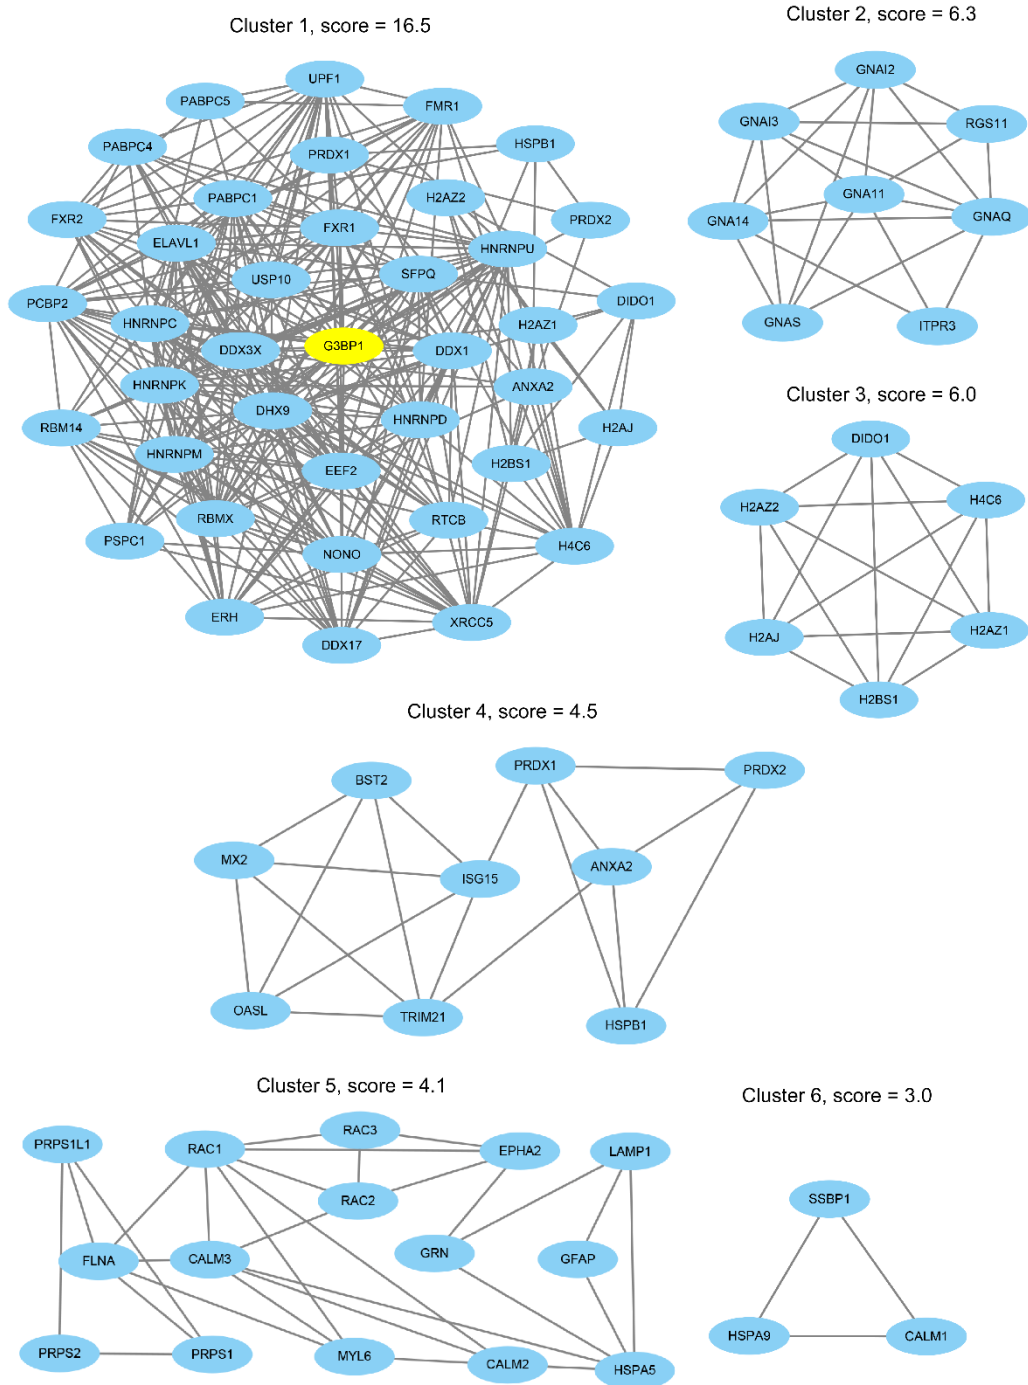

**Figure S4.** Identification of hub proteins from the PPI network with the MCODE algorithm. Substantial gene clusters were extracted by considering the score of MCODE and the number of interconnected nodes. The clusters were inferred using default settings, including a degree cutoff of 2, a node score cutoff of 0.2, a K core of 2, and a maximum depth of 100.



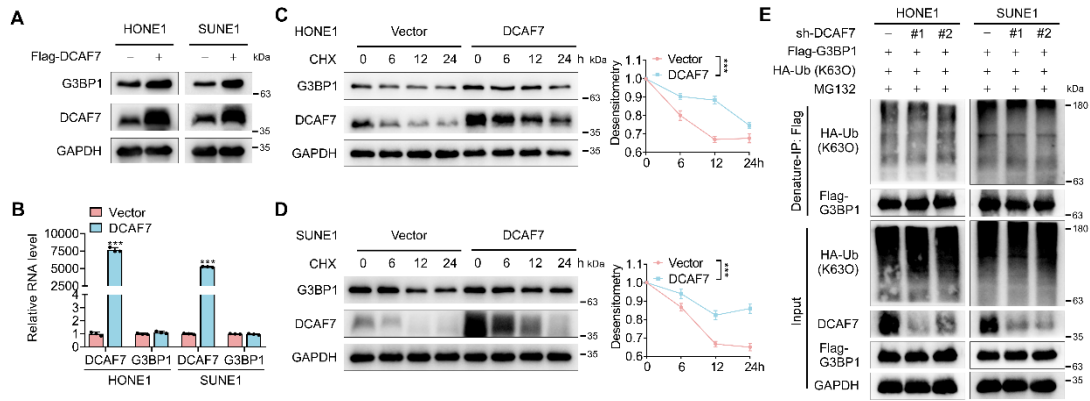

**Figure S5.** Overexpression of DCAF7 prolongs the half-life of G3BP1. A, B) G3BP1 expression in DCAF7-overexpressing and control HONE1 or SUNE1 cells was evaluated through western blotting and RT-qPCR assays. Mean ( $n = 3$ )  $\pm$  s.d. Student's  $t$ -test, \*\*\*  $P < 0.001$ . C, D) G3BP1, DCAF7 and GAPDH protein levels in HONE1 and SUNE1 cells following CHX treatment (100  $\mu\text{g}/\text{mL}$ ) for indicated times. Mean ( $n = 3$ )  $\pm$  s.d. Two-way ANOVA, \*\*\*  $P < 0.001$ . E) Denaturing IP (with an anti-Flag antibody) and IB of HA, Flag, DCAF7 and GAPDH in HONE1 and SUNE1 cells transfected with the indicated plasmids following MG132 treatment (10  $\mu\text{M}$ , 6 h). The unprocessed images of the blots are shown in Figure S10.

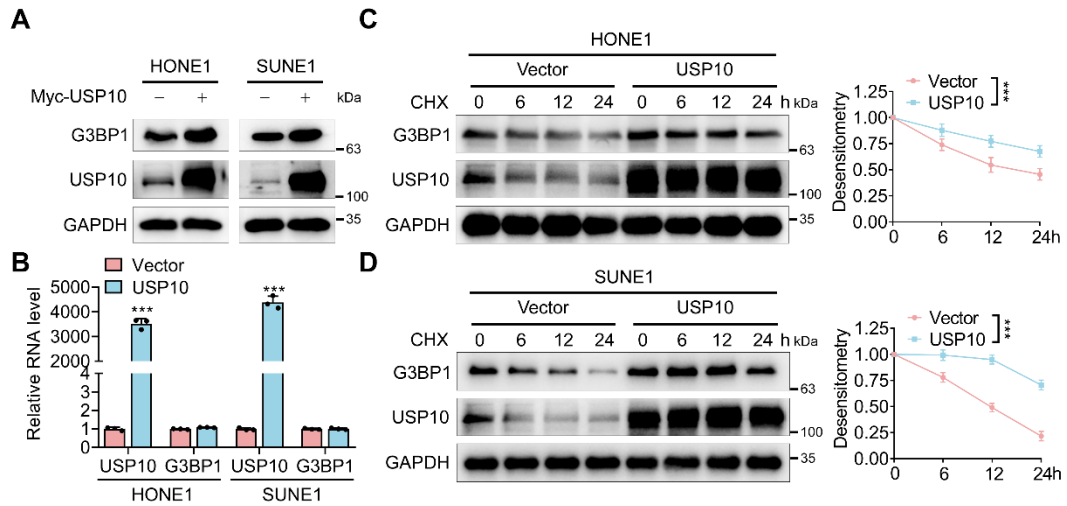

**Figure S6.** Overexpression of USP10 prolongs the half-life of G3BP1. A, B) G3BP1 expression in USP10-overexpressing and control HONE1 or SUNE1 cells was evaluated through western blotting and RT-qPCR assays. Mean ( $n = 3$ )  $\pm$  s.d. Student's t-test, \*\*\*  $P < 0.001$ . C, D) G3BP1, USP10 and GAPDH protein levels in HONE1 and SUNE1 cells following CHX treatment (100  $\mu\text{g}/\text{mL}$ ) for indicated times. Mean ( $n = 3$ )  $\pm$  s.d. Two-way ANOVA, \*\*\*  $P < 0.001$ . The unprocessed images of the blots are shown in Figure S10.

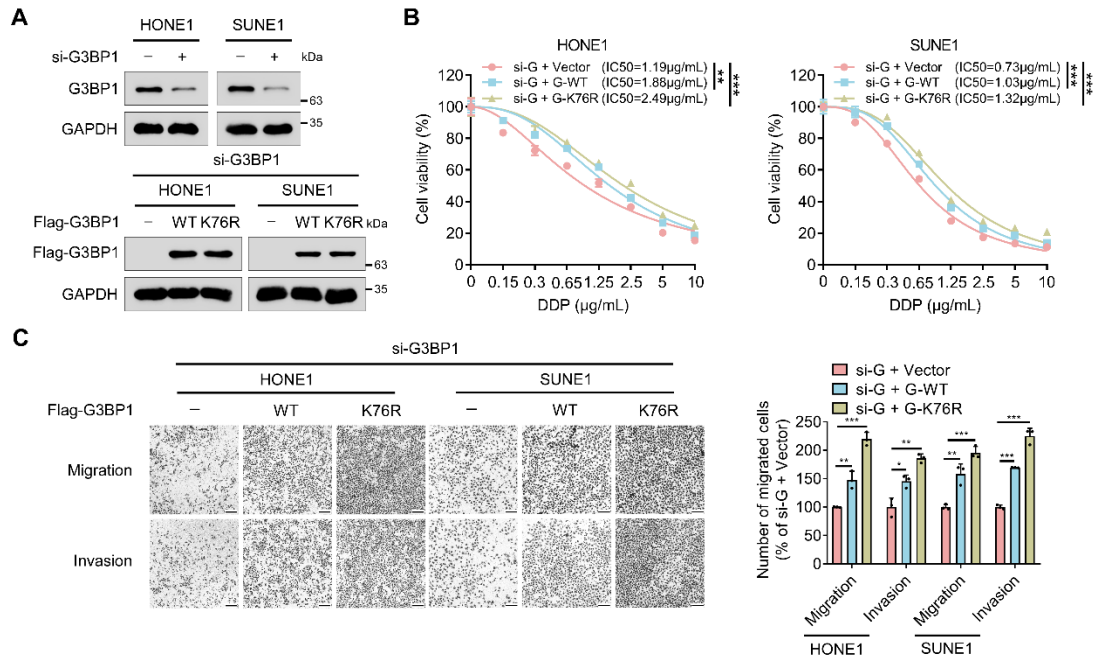

**Figure S7.** Significant enhancement of cisplatin resistance and migratory and invasive capabilities in NPC cells expressing the G3BP1 K76R mutant. A) Protein levels of G3BP1, Flag-G3BP1 and GAPDH in HONE1 and SUNE1 cells transfected with siRNA targeting G3BP1 (si-G3BP1) and either empty vector, Flag-G3BP1 WT, or K76R. B) A CCK-8 assay evaluating cisplatin resistance in NPC cells transfected with si-G3BP1, Flag-G3BP1 WT, or K76R following treatment with specified concentrations of cisplatin for 48 hours. Data are presented as mean ( $n = 4$ )  $\pm$  s.d. Statistical significance was determined using a two-way ANOVA, \*\*  $P < 0.01$ . C) Transwell assays were conducted in HONE1 and SUNE1 cells transfected with siRNA targeting G3BP1 (si-G3BP1) and either empty vector, Flag-G3BP1 WT, or K76R. Representative images and quantitative results are presented, with scale bars representing 200  $\mu$ m. Mean ( $n = 3$ )  $\pm$  s.d. One-way ANOVA, \*  $P < 0.05$ , \*\*  $P < 0.01$ , \*\*\*  $P < 0.001$ . The unprocessed images of the blots are shown in Figure S10.

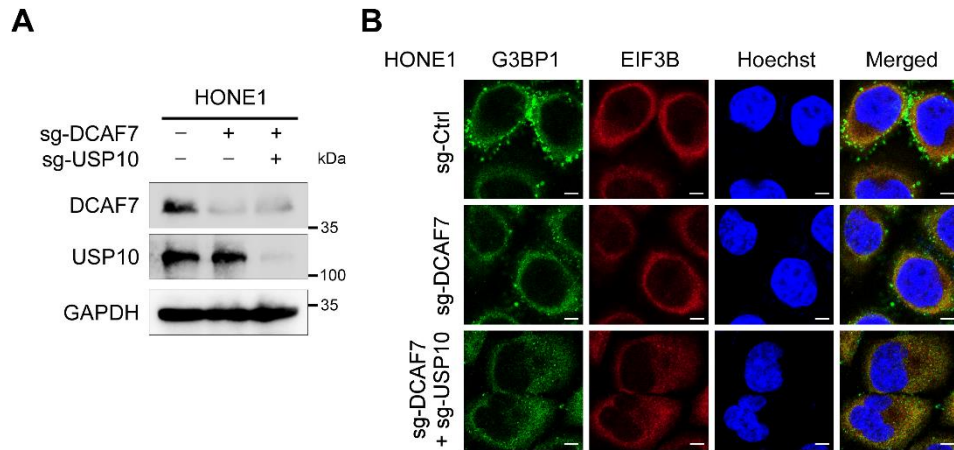

**Figure S8.** Both DCAF7 and USP10 are important positive regulators in the formation of cisplatin-induced SG-like structures. A) The efficiency of DCAF7 and USP10 knockout was confirmed via western blot analysis. B) Immunofluorescence staining (using anti-G3BP1 or anti-EIF3B antibodies) of HONE1 cells transfected with the indicated sgRNAs following treatment with cisplatin (250  $\mu$ M) for 4 hours. Scale bar represents 5  $\mu$ m. The unprocessed images of the blots are shown in Figure S10.

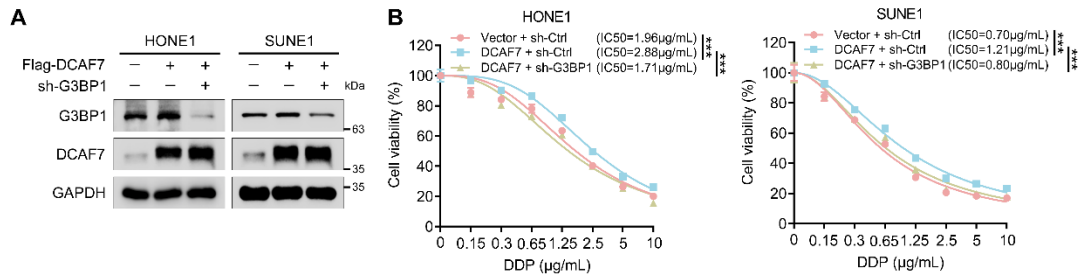

**Figure S9.** DCAF7 promotes NPC cisplatin resistance via G3BP1. A) Western blot analysis was performed to assess the efficiency of DCAF7 overexpression and G3BP1 knockdown. B) A CCK-8 assay was used to evaluate cisplatin resistance in NPC cells transfected with the indicated plasmids following treatment with various concentrations of cisplatin for 48 h. Mean ( $n = 4$ )  $\pm$  s.d. Two-way ANOVA, \*\*  $P < 0.01$ . The unprocessed images of the blots are shown in Figure S10.

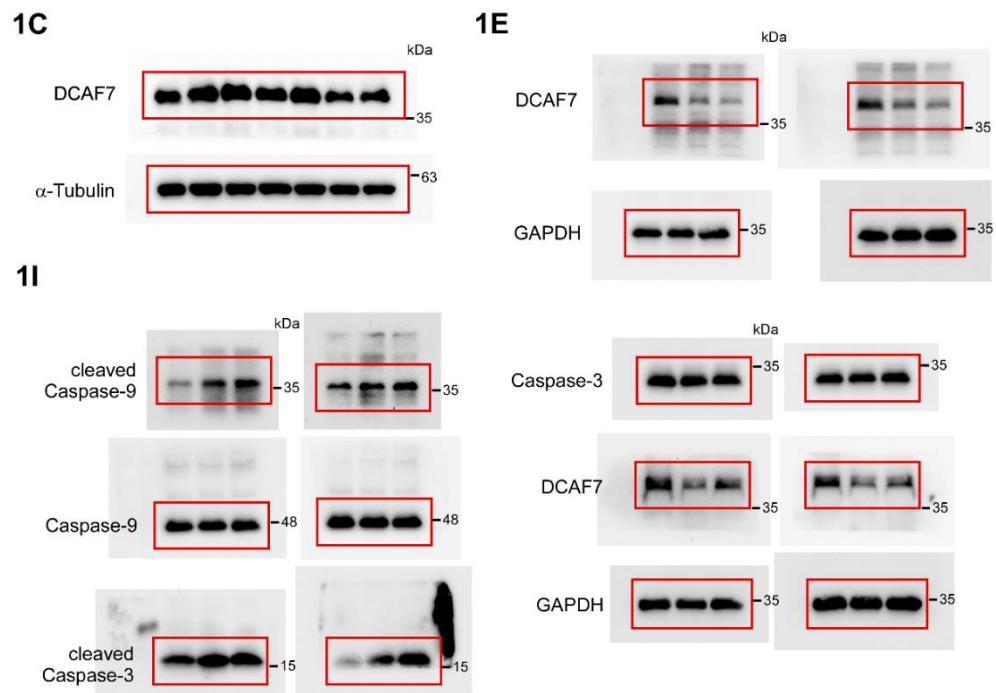

**Figure S10. (Unprocessed immunoblots)**

Unprocessed immunoblots for indicated Figures panels.

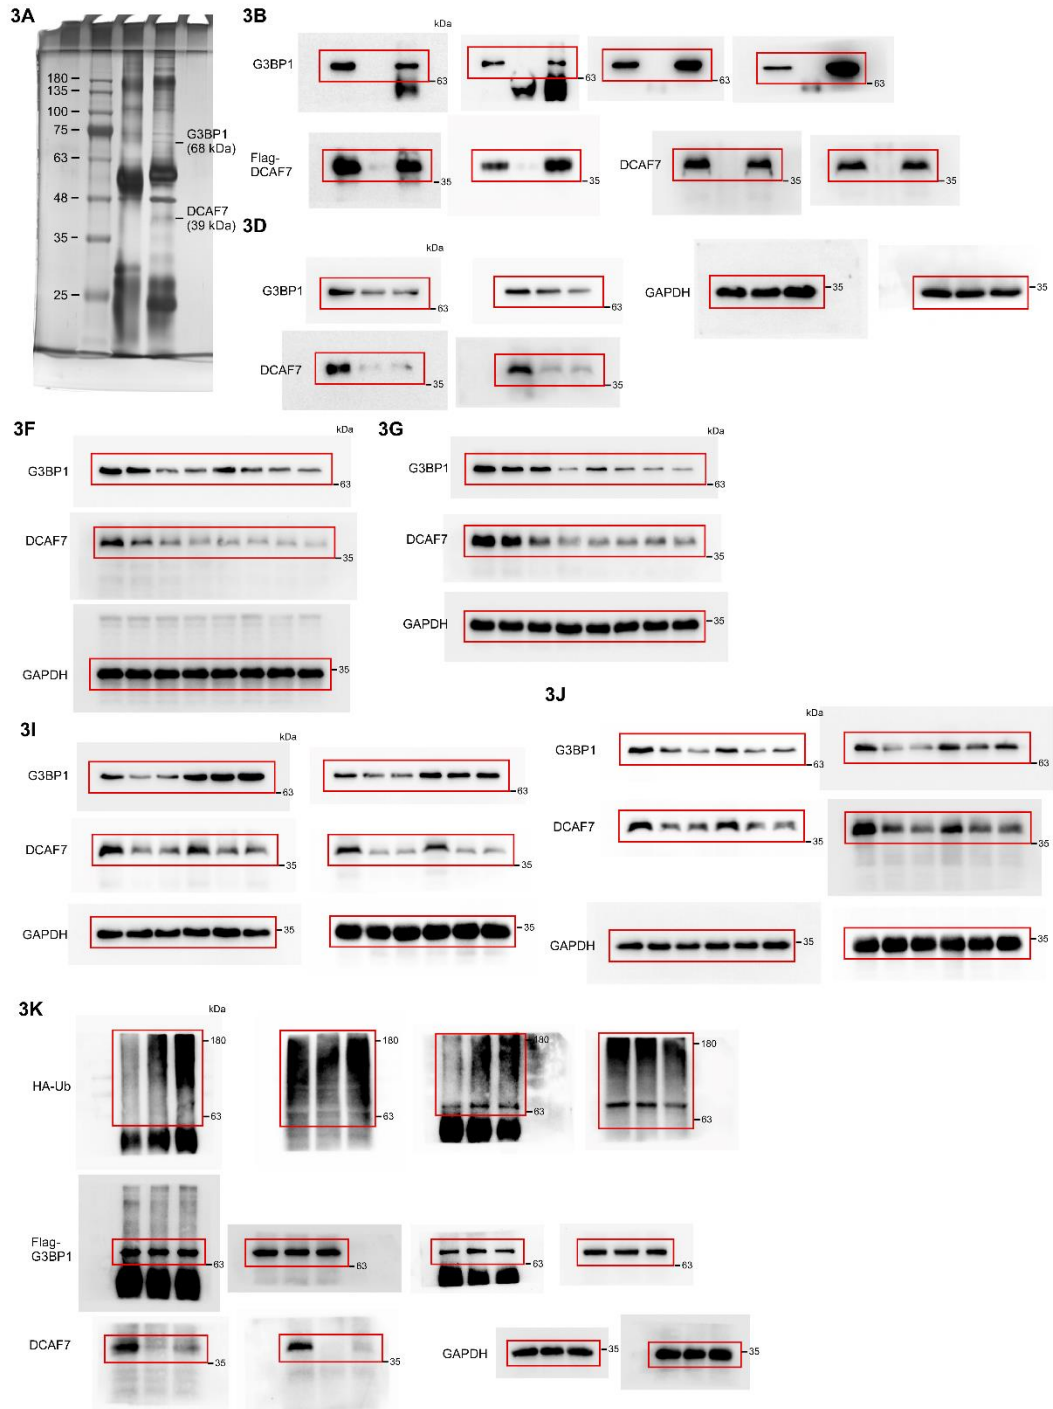

**Figure S10. (cont'd) (Unprocessed immunoblots (continued))**

Unprocessed immunoblots for indicated Figures panels.

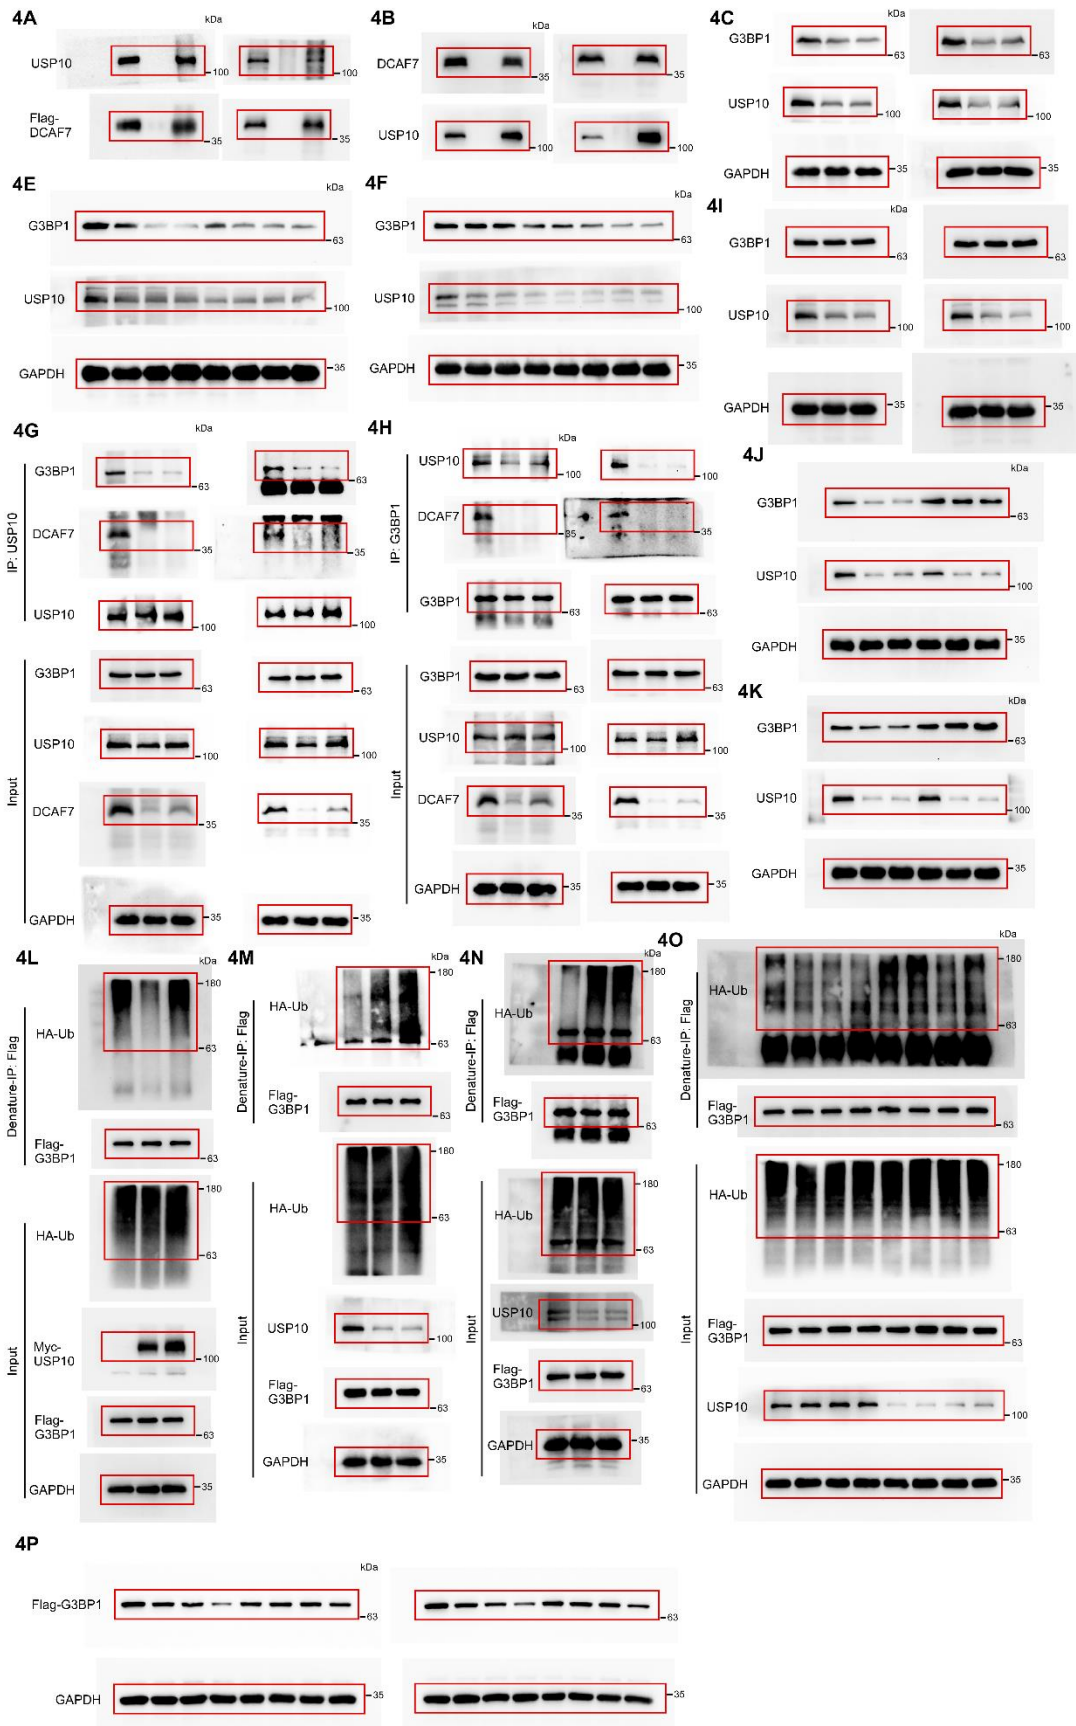

**Figure S10. (cont'd) (Unprocessed immunoblots (continued))**

Unprocessed immunoblots for indicated Figures panels.



**5F**

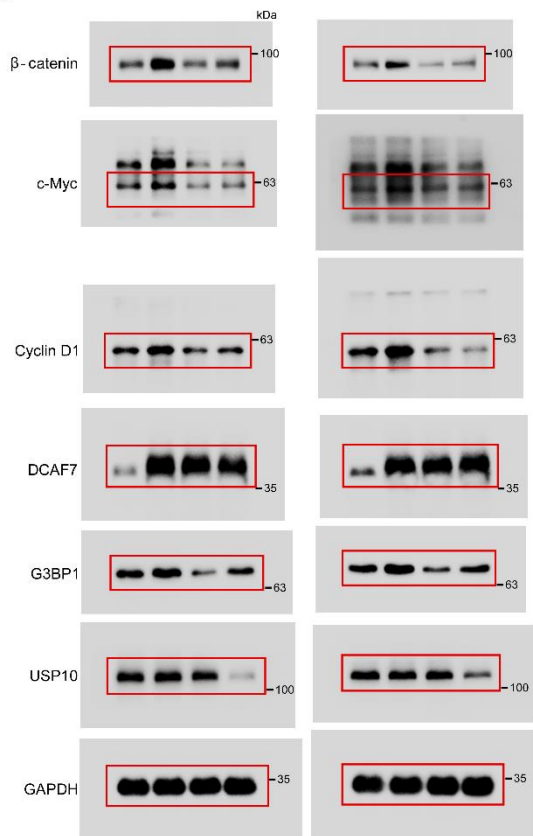

**6A**

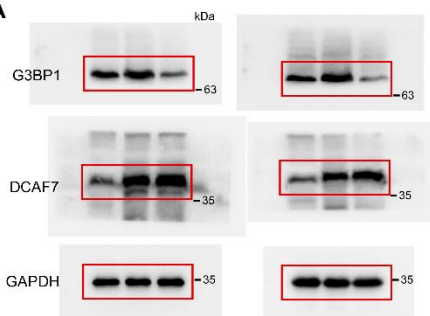

**6C**

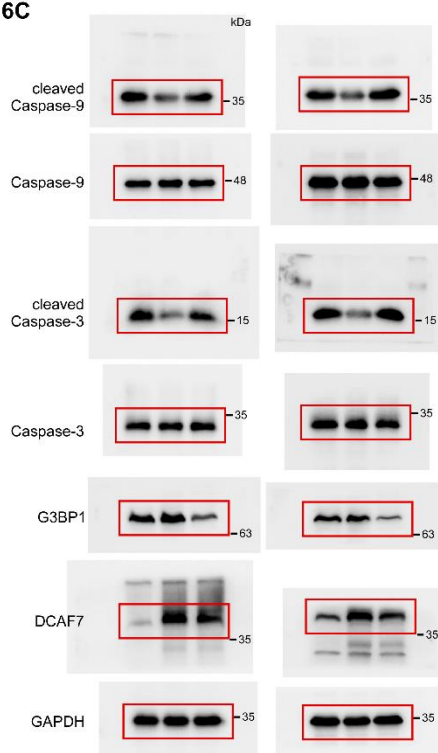

**6F**

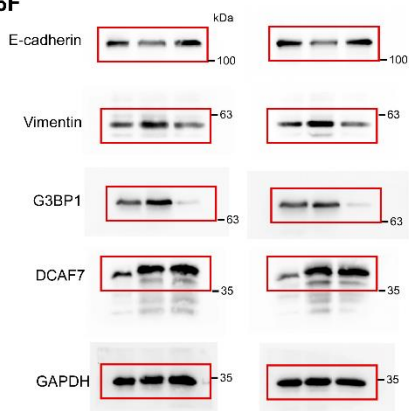

**Figure S10. (cont'd) (Unprocessed immunoblots (continued))**

Unprocessed immunoblots for indicated Figures panels.

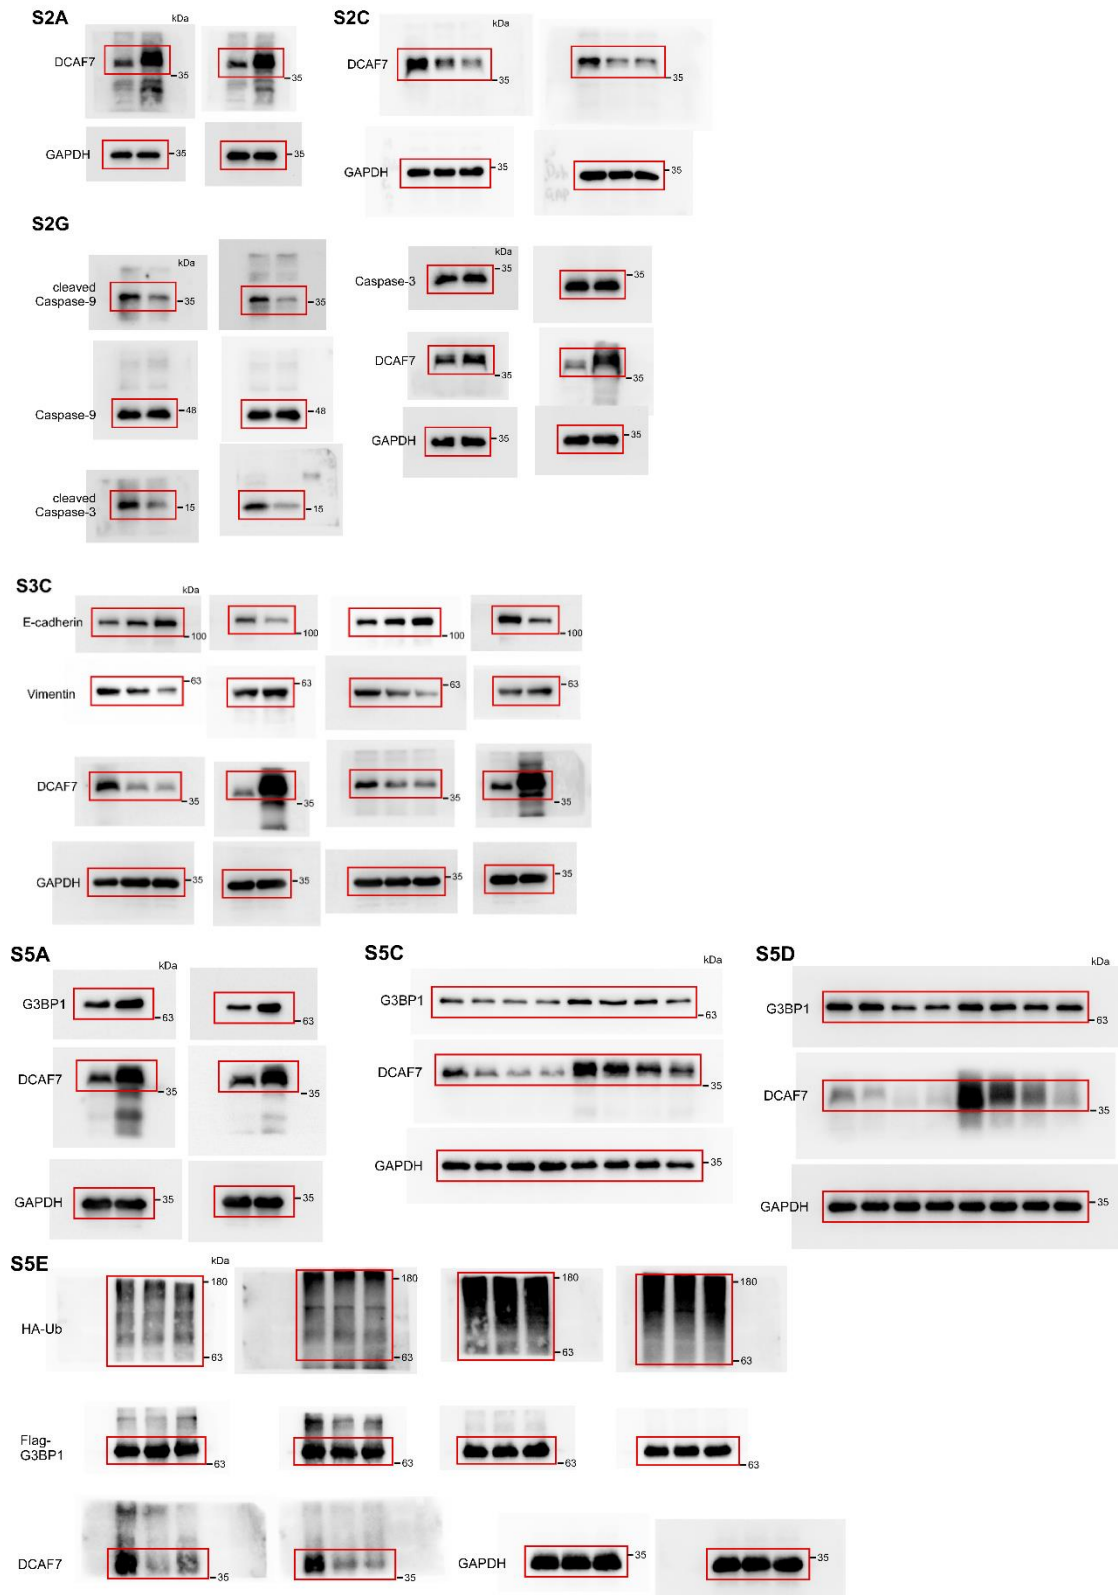

**Figure S10. (cont'd) (Unprocessed immunoblots (continued))**

Unprocessed immunoblots for indicated Figures panels.

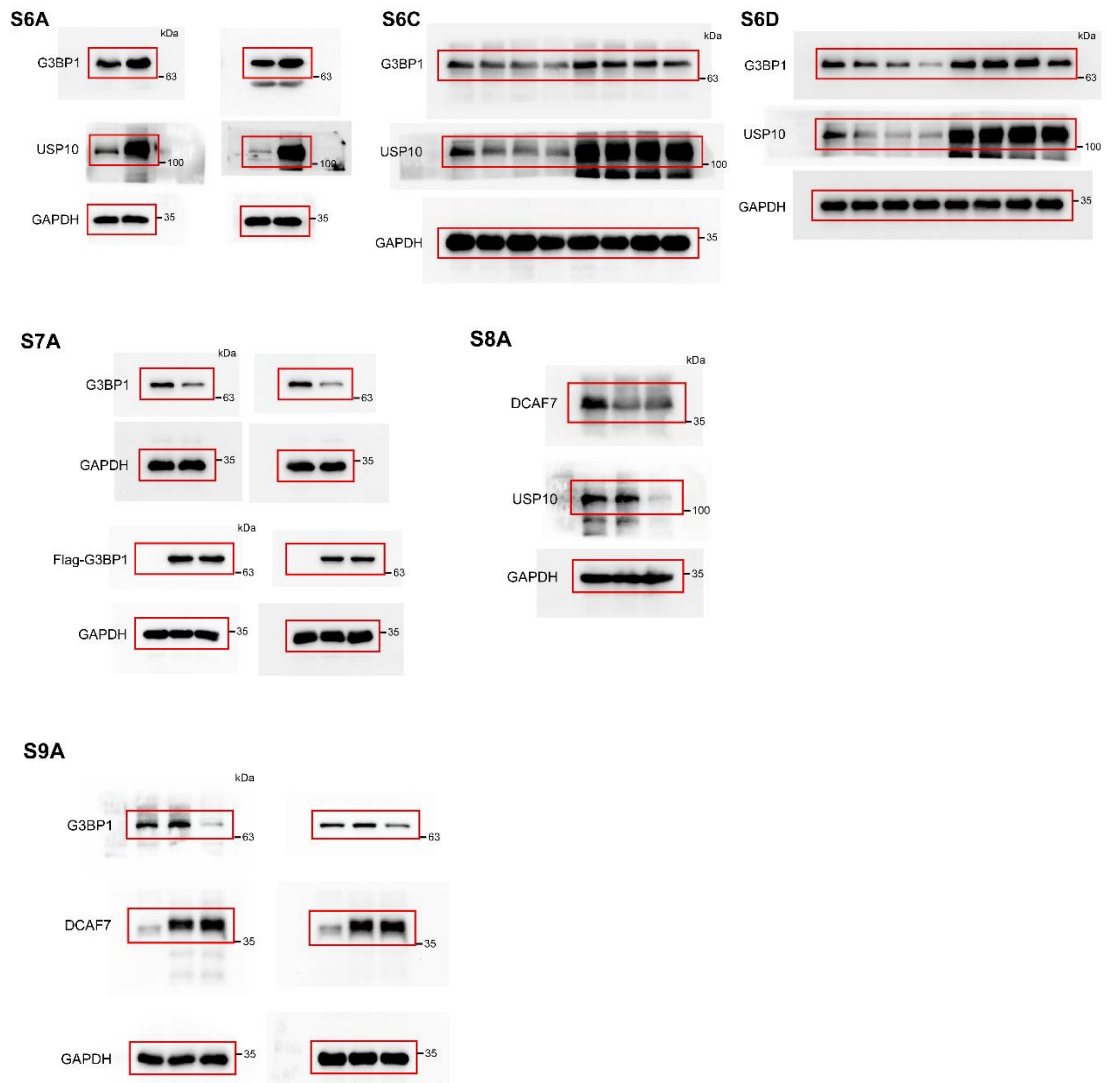

**Figure S10. (cont'd) (Unprocessed immunoblots (continued))**

Unprocessed immunoblots for indicated Figures panels.

**Table S1.** Mass spectrometry analysis results for the anti-FLAG (FLAG-tagged DCAF7) immunoprecipitation complex.

| Accession             | -10lgP | Area     | #Peptides | Description                                                         |
|-----------------------|--------|----------|-----------|---------------------------------------------------------------------|
| sp P23246 SFPQ_HUMAN  | 242.67 | 3.14E+08 | 27        | Splicing factor proline- and glutamine-rich                         |
| sp P08670 VIME_HUMAN  | 240.02 | 1.93E+08 | 26        | Vimentin                                                            |
| sp P11940 PABP1_HUMAN | 217.58 | 8.81E+07 | 17        | Polyadenylate-binding protein 1                                     |
| sp Q15233 NONO_HUMAN  | 210.28 | 1.06E+08 | 23        | Non-POU domain-containing octamer-binding protein                   |
| sp Q9UHB6 LIMA1_HUMAN | 190.94 | 1.16E+08 | 17        | LIM domain and actin-binding protein 1                              |
| sp Q96PK6 RBM14_HUMAN | 185.44 | 2.34E+07 | 11        | RNA-binding protein 14                                              |
| sp P0CG39 POTEJ_HUMAN | 180.89 | 7.97E+06 | 14        | POTE ankyrin domain family member J                                 |
| sp Q13310 PABP4_HUMAN | 174.29 | 9.21E+06 | 8         | Polyadenylate-binding protein 4                                     |
| sp P61962 DCAF7_HUMAN | 160.56 | 5.19E+07 | 8         | DDB1- and CUL4-associated factor 7                                  |
| sp P20592 MX2_HUMAN   | 159.5  | 3.67E+07 | 12        | Interferon-induced GTP-binding protein Mx2                          |
| sp P51114 FXR1_HUMAN  | 158.71 | 3.67E+07 | 10        | Fragile X mental retardation syndrome-related protein 1             |
| sp P52732 KIF11_HUMAN | 153.21 | 2.26E+07 | 11        | Kinesin-like protein KIF11                                          |
| sp P51116 FXR2_HUMAN  | 145.88 | 1.20E+07 | 8         | Fragile X mental retardation syndrome-related protein 2             |
| sp Q13283 G3BP1_HUMAN | 144.84 | 5.16E+07 | 9         | Ras GTPase-activating protein-binding protein 1                     |
| sp P52272 HNRPM_HUMAN | 138.02 | 2.12E+07 | 8         | Heterogeneous nuclear ribonucleoprotein M                           |
| sp Q08211 DHX9_HUMAN  | 135.03 | 8.15E+06 | 5         | ATP-dependent RNA helicase A                                        |
| sp Q96C19 EFHD2_HUMAN | 130.73 | 1.16E+07 | 6         | EF-hand domain-containing protein D2                                |
| sp Q8WXF1 PSPC1_HUMAN | 130.46 | 1.78E+07 | 7         | Paraspeckle component 1                                             |
| sp P11021 BIP_HUMAN   | 129.46 | 1.23E+07 | 8         | Endoplasmic reticulum chaperone BiP                                 |
| sp P14136 GFAP_HUMAN  | 122.89 | 8.74E+05 | 7         | Glial fibrillary acidic protein                                     |
| sp Q15646 OASL_HUMAN  | 122.38 | 7.51E+06 | 7         | 2'-5'-oligoadenylate synthase-like protein                          |
| sp P08174 DAF_HUMAN   | 121.18 | 6.24E+07 | 6         | Complement decay-accelerating factor                                |
| sp Q15025 TNIP1_HUMAN | 111.39 | 3.47E+06 | 3         | TNFAIP3-interacting protein 1                                       |
| sp P04899 GNAI2_HUMAN | 109.5  | 6.88E+06 | 6         | Guanine nucleotide-binding protein G(i) subunit alpha-2             |
| sp Q5JWF2 GNAS1_HUMAN | 106.31 | 1.05E+07 | 5         | Guanine nucleotide-binding protein G(s) subunit alpha isoforms Xlas |
| sp Q14694 USP10_HUMAN | 105.8  | 4.69E+06 | 4         | Ubiquitin carboxyl-terminal hydrolase 10                            |
| sp Q9NYL9 TMOD3_HUMAN | 104.48 | 1.26E+07 | 3         | Tropomodulin-3                                                      |
| sp O14974 MYPT1_HUMAN | 104.41 | 5.53E+06 | 5         | Protein phosphatase 1 regulatory subunit 12A                        |
| sp Q8IVT2 MISP_HUMAN  | 104.32 | 9.00E+06 | 5         | Mitotic interactor and substrate of PLK1                            |
| sp Q06787 FMR1_HUMAN  | 104.03 | 2.81E+06 | 5         | Synaptic functional regulator FMR1                                  |
| sp O00160 MYO1F_HUMAN | 101.65 | 3.74E+07 | 6         | Unconventional myosin-If                                            |
| sp P60891 PRPS1_HUMAN | 96.8   | 3.93E+06 | 2         | Ribose-phosphate pyrophosphokinase 1                                |
| sp P11908 PRPS2_HUMAN | 96.8   | 3.93E+06 | 2         | Ribose-phosphate pyrophosphokinase 2                                |
| sp P21108 PRPS3_HUMAN | 96.8   | 3.93E+06 | 2         | Ribose-phosphate pyrophosphokinase 3                                |
| sp P62805 H4_HUMAN    | 94.64  | 1.19E+07 | 3         | Histone H4                                                          |
| sp Q14573 ITPR3_HUMAN | 93.5   | 4.22E+06 | 4         | Inositol 1 4 5-trisphosphate receptor type 3                        |
| sp O43854 EDIL3_HUMAN | 91.67  | 7.30E+06 | 4         | EGF-like repeat and discoidin I-like domain-containing protein 3    |
| sp P08754 GNAI3_HUMAN | 90.27  | 4.36E+06 | 5         | Guanine nucleotide-binding protein G(i) subunit alpha               |

|                       |       |          |   |                                                          |
|-----------------------|-------|----------|---|----------------------------------------------------------|
| sp P07355 ANXA2_HUMAN | 88.7  | 3.04E+06 | 2 | Annexin A2                                               |
| sp Q92841 DDX17_HUMAN | 87.9  | 1.42E+06 | 2 | Probable ATP-dependent RNA helicase DDX17                |
| sp Q6YHK3 CD109_HUMAN | 86.38 | 2.20E+06 | 5 | CD109 antigen                                            |
| sp Q9Y3I0 RTCB_HUMAN  | 81.65 | 1.72E+06 | 2 | RNA-splicing ligase RtcB homolog                         |
| sp P21333 FLNA_HUMAN  | 77.37 | 1.56E+05 | 7 | Filamin-A                                                |
| sp P29317 EPHA2_HUMAN | 77.2  | 2.02E+06 | 2 | Ephrin type-A receptor 2                                 |
| sp P38646 GRP75_HUMAN | 76.41 | 1.86E+06 | 2 | Stress-70 protein mitochondrial                          |
| sp P62807 H2B1C_HUMAN | 75.23 | 1.92E+07 | 3 | Histone H2B type 1-C/E/F/G/I                             |
| sp P0DP25 CALM3_HUMAN | 73.85 | 2.04E+07 | 3 | Calmodulin-3                                             |
| sp P0DP24 CALM2_HUMAN | 73.85 | 2.04E+07 | 3 | Calmodulin-2                                             |
| sp P0DP23 CALM1_HUMAN | 73.85 | 2.04E+07 | 3 | Calmodulin-1                                             |
| sp Q00839 HNRPU_HUMAN | 73.79 | 1.92E+06 | 3 | Heterogeneous nuclear ribonucleoprotein U                |
| sp P78386 KRT85_HUMAN | 73.14 | 8.64E+07 | 5 | Keratin type II cuticular Hb5                            |
| sp P07910 HNRPC_HUMAN | 72.43 | 4.76E+06 | 3 | Heterogeneous nuclear ribonucleoproteins C1/C2           |
| sp Q13772 NCOA4_HUMAN | 72.37 | 3.22E+06 | 3 | Nuclear receptor coactivator 4                           |
| sp Q15717 ELAV1_HUMAN | 71.69 | 3.20E+06 | 2 | ELAV-like protein 1                                      |
| sp Q9Y446 PKP3_HUMAN  | 70.33 | 3.24E+06 | 4 | Plakophilin-3                                            |
| sp O75369 FLNB_HUMAN  | 68.77 | 4.48E+05 | 3 | Filamin-B                                                |
| sp P84090 ERH_HUMAN   | 67.75 | 5.42E+06 | 2 | Enhancer of rudimentary homolog                          |
| sp P62280 RS11_HUMAN  | 65.32 | 3.46E+06 | 3 | 40S ribosomal protein S11                                |
| sp Q3MHD2 LSM12_HUMAN | 60.44 | 4.94E+05 | 1 | Protein LSM12 homolog                                    |
| sp P60660 MYL6_HUMAN  | 59.89 | 6.93E+06 | 2 | Myosin light polypeptide 6                               |
| sp P19474 RO52_HUMAN  | 59.51 | 4.73E+06 | 3 | E3 ubiquitin-protein ligase TRIM21                       |
| sp O00571 DDX3X_HUMAN | 57.55 | 2.32E+06 | 3 | ATP-dependent RNA helicase DDX3X                         |
| sp P67936 TPM4_HUMAN  | 57.53 | 1.70E+06 | 2 | Tropomyosin alpha-4 chain                                |
| sp O95425 SVIL_HUMAN  | 55.83 | 2.07E+06 | 3 | Supervillin                                              |
| sp Q13751 LAMB3_HUMAN | 55.35 | 3.97E+04 | 1 | Laminin subunit beta-3                                   |
| sp P61978 HNRPK_HUMAN | 55.23 | 2.39E+06 | 2 | Heterogeneous nuclear ribonucleoprotein K                |
| sp P81605 DCD_HUMAN   | 53.23 | 1.69E+06 | 1 | Dermcidin                                                |
| sp P13639 EF2_HUMAN   | 52.75 | 2.99E+06 | 2 | Elongation factor 2                                      |
| sp Q14103 HNRPD_HUMAN | 50.96 | 1.08E+06 | 2 | Heterogeneous nuclear ribonucleoprotein D0               |
| sp P38159 RBMX_HUMAN  | 50.92 | 3.07E+06 | 2 | RNA-binding motif protein X chromosome                   |
| sp Q9BTC0 DIDO1_HUMAN | 47.87 | 3.22E+06 | 2 | Death-inducer obliterator 1                              |
| sp P28799 GRN_HUMAN   | 46.91 | 3.48E+05 | 2 | Progranulin                                              |
| sp Q92900 RENT1_HUMAN | 46.87 | 1.33E+06 | 1 | Regulator of nonsense transcripts 1                      |
| sp Q5M775 CYTSB_HUMAN | 45.1  | 6.05E+05 | 2 | Cytospin-B                                               |
| sp P16104 H2AX_HUMAN  | 44.39 | 1.43E+06 | 1 | Histone H2AX                                             |
| sp P0C0S5 H2AZ_HUMAN  | 44.39 | 1.43E+06 | 1 | Histone H2A.Z                                            |
| sp Q71UI9 H2AV_HUMAN  | 44.39 | 1.43E+06 | 1 | Histone H2A.V                                            |
| sp Q9BTM1 H2AJ_HUMAN  | 44.39 | 1.43E+06 | 1 | Histone H2A.J                                            |
| sp P13010 XRCC5_HUMAN | 43.42 | 7.53E+05 | 1 | X-ray repair cross-complementing protein 5               |
| sp Q96HS1 PGAM5_HUMAN | 43.33 | 2.96E+06 | 3 | Serine/threonine-protein phosphatase PGAM5 mitochondrial |
| sp P09874 PARP1_HUMAN | 42.61 | 1.21E+06 | 1 | Poly [ADP-ribose] polymerase 1                           |
| sp Q14596 NBR1_HUMAN  | 42.38 | 1.55E+06 | 1 | Next to BRCA1 gene 1 protein                             |

|                        |       |          |   |                                                       |
|------------------------|-------|----------|---|-------------------------------------------------------|
| sp O15144 ARPC2_HUMAN  | 41.94 | 1.89E+06 | 1 | Actin-related protein 2/3 complex subunit 2           |
| sp O15145 ARPC3_HUMAN  | 41.34 | 1.38E+06 | 1 | Actin-related protein 2/3 complex subunit 3           |
| sp O95837 GNA14_HUMAN  | 40.01 | 4.09E+05 | 1 | Guanine nucleotide-binding protein subunit alpha-14   |
| sp P29992 GNA11_HUMAN  | 40.01 | 4.09E+05 | 1 | Guanine nucleotide-binding protein subunit alpha-11   |
| sp P50148 GNAQ_HUMAN   | 40.01 | 4.09E+05 | 1 | Guanine nucleotide-binding protein G(q) subunit alpha |
| sp Q92499 DDX1_HUMAN   | 39.94 | 6.46E+05 | 1 | ATP-dependent RNA helicase DDX1                       |
| sp P0DOX8 IGL1_HUMAN   | 39.29 | 1.99E+07 | 1 | Immunoglobulin lambda-1 light chain                   |
| sp B9A064 IGLL5_HUMAN  | 39.29 | 1.99E+07 | 1 | Immunoglobulin lambda-like polypeptide 5              |
| sp Q7L2E3 DHX30_HUMAN  | 38.73 | 9.53E+05 | 1 | ATP-dependent RNA helicase DHX30                      |
| sp P60763 RAC3_HUMAN   | 38.67 | 1.23E+06 | 1 | Ras-related C3 botulinum toxin substrate 3            |
| sp P15153 RAC2_HUMAN   | 38.67 | 1.23E+06 | 1 | Ras-related C3 botulinum toxin substrate 2            |
| sp P63000 RAC1_HUMAN   | 38.67 | 1.23E+06 | 1 | Ras-related C3 botulinum toxin substrate 1            |
| sp P13987 CD59_HUMAN   | 38.33 | 5.56E+06 | 1 | CD59 glycoprotein                                     |
| sp P04792 HSPB1_HUMAN  | 36.31 | 1.39E+06 | 1 | Heat shock protein beta-1                             |
| sp P11279 LAMP1_HUMAN  | 36.3  | 5.33E+06 | 1 | Lysosome-associated membrane glycoprotein 1           |
| sp Q13075 BIRC1_HUMAN  | 35.13 | 1.28E+08 | 2 | Baculoviral IAP repeat-containing protein 1           |
| sp Q6WCQ1 MPRIIP_HUMAN | 34.09 | 2.14E+06 | 1 | Myosin phosphatase Rho-interacting protein            |
| sp Q08999 RBL2_HUMAN   | 32.32 | 4.62E+06 | 2 | Retinoblastoma-like protein 2                         |
| sp Q71RC2 LARP4_HUMAN  | 30.39 | 6.12E+05 | 1 | La-related protein 4                                  |
| sp P09382 LEG1_HUMAN   | 29.58 | 1.60E+06 | 1 | Galectin-1                                            |
| sp P05161 ISG15_HUMAN  | 27.02 | 5.72E+05 | 1 | Ubiquitin-like protein ISG15                          |
| sp Q96L33 RHOV_HUMAN   | 26.49 | 1.14E+06 | 1 | Rho-related GTP-binding protein RhoV                  |
| sp Q06830 PRDX1_HUMAN  | 26.28 | 4.52E+05 | 1 | Peroxiredoxin-1                                       |
| sp P32119 PRDX2_HUMAN  | 26.28 | 4.52E+05 | 1 | Peroxiredoxin-2                                       |
| sp Q04837 SSBP_HUMAN   | 26.17 | 1.39E+06 | 1 | Single-stranded DNA-binding protein mitochondrial     |
| sp Q96RK0 CIC_HUMAN    | 24.95 | 1.33E+06 | 1 | Protein capicua homolog                               |
| sp Q5HYA8 MKS3_HUMAN   | 23.92 | 3.92E+06 | 1 | Meckelin                                              |
| sp Q9NZD8 SPG21_HUMAN  | 23.01 | 1.03E+06 | 1 | Masparidin                                            |
| sp Q96DU9 PABP5_HUMAN  | 22.82 | 7.77E+02 | 1 | Polyadenylate-binding protein 5                       |
| sp Q2V2M9 FHOD3_HUMAN  | 22.71 | 6.23E+05 | 1 | FH1/FH2 domain-containing protein 3                   |
| sp Q15366 PCBP2_HUMAN  | 22.52 | 1.80E+06 | 1 | Poly(rC)-binding protein 2                            |
| sp Q10589 BST2_HUMAN   | 21.38 | 3.72E+06 | 1 | Bone marrow stromal antigen 2                         |
| sp Q9HCK8 CHD8_HUMAN   | 21.19 | 1.31E+06 | 1 | Chromodomain-helicase-DNA-binding protein 8           |

**Table S2.** Correlations between DCAF7 expression levels and clinical features in Nasopharyngeal carcinoma patients.

| Characteristic     | Number of patients (%)            |                                  | <i>P</i> -value* |
|--------------------|-----------------------------------|----------------------------------|------------------|
|                    | Low expression group<br>(n = 117) | Low expression group<br>(n = 78) |                  |
| Gender             |                                   |                                  |                  |
| Male               | 91 (77.78%)                       | 55 (70.51%)                      | 0.252            |
| Female             | 26 (22.22%)                       | 23 (29.49%)                      |                  |
| Age (years old)    |                                   |                                  |                  |
| < 60               | 101 (86.32%)                      | 68 (87.18%)                      | 0.863            |
| ≥ 60               | 16 (13.68%)                       | 10 (12.82%)                      |                  |
| TNM stage†         |                                   |                                  |                  |
| I/II               | 43 (36.75%)                       | 28 (35.9%)                       | 0.903            |
| III/IV             | 74 (63.25%)                       | 50 (64.1%)                       |                  |
| Distant metastasis |                                   |                                  |                  |
| Yes                | 107 (91.45%)                      | 59 (75.64%)                      | 0.002            |
| No                 | 10 (8.55%)                        | 19 (24.36%)                      |                  |
| Disease            |                                   |                                  |                  |
| Yes                | 92 (78.63%)                       | 49 (62.82%)                      | 0.016            |
| No                 | 25 (21.37%)                       | 29 (37.18%)                      |                  |
| Death              |                                   |                                  |                  |
| Yes                | 100 (85.47%)                      | 56 (71.79%)                      | 0.019            |
| No                 | 17 (14.53%)                       | 22 (28.21%)                      |                  |

\* Pearson  $\chi^2$  test was used to compute the *P*-value.

† All patients were restaged based on the 7th edition of the AJCC Cancer Staging Manual.

**Table S3** List of primers used in this study

## RT-qPCR primers

| Gene    | Forward Primer (5'→3')  | Reverse Primer (5'→3') |
|---------|-------------------------|------------------------|
| DCAF7   | CACGGCAAACGGAAGGAGAT    | GACGCCTTTTGTGTCAGGGA   |
| G3BP1   | AGCCTGTTCAGAAAGTCCTTAGC | CGAAGGCGATTATCTCGTCGGT |
| USP10   | AAATGCCACCGAACCTATCGGC  | CAGCCATTCAGACCGATCTGGA |
| Tubulin | CGTGTTTCGGCCAGAGTGGTGC  | GGGTGAGGGCATGACGCTGAA  |

## Primers used for shRNA plasmid construction

| Name         | Primer (5'→3')                                                   |
|--------------|------------------------------------------------------------------|
| sh-DCAF7#1-F | CCGGGTTTCAGCTTGTGGTTTAGATCTCGAGATCTAAACCA<br>ACAAGCTGAACTTTTTTG  |
| sh-DCAF7#1-R | AATTCAAAAAAGTTCAGCTTGTGGTTTAGATCTCGAGATC<br>TAAACCAACAAGCTGAAC   |
| sh-DCAF7#2-F | CCGGGCTGGAGTGTTTGCTAAACAACCTCGAGTTGTTTAGC<br>AAACACTCCAGCTTTTTTG |
| sh-DCAF7#2-R | AATTCAAAAAAGCTGGAGTGTTTGCTAAACAACCTCGAGTT<br>GTTTAGCAAACACTCCAGC |
| sh-G3BP1#1-F | CCGGCGGGAATTTGTGAGACAGTATCTCGAGATACTGTCT<br>CACAAATCCCGTTTTTG    |
| sh-G3BP1#1-R | AATTCAAAAACGGGAATTTGTGAGACAGTATCTCGAGATA<br>CTGTCTCACAAATCCCG    |
| sh-G3BP1#2-F | CCGGCCACCTCATGTTGTAAAGTACTCGAGTACTTTAACA<br>ACATGAGGTGGTTTTTG    |
| sh-G3BP1#2-R | AATTCAAAAACCACCTCATGTTGTAAAGTACTCGAGTACT<br>TTAACAACATGAGGTGG    |
| sh-USP10#1-F | CCGGCGACAAGCTCTTGGAGATAAACTCGAGTTTATCTCC<br>AAGAGCTTGTGCTTTTTTG  |
| sh-USP10#1-R | AATTCAAAAACGACAAGCTCTTGGAGATAAACTCGAGTTT<br>ATCTCCAAGAGCTTGTGCG  |
| sh-USP10#2-F | CCGGCCTATGTGGAAACTAAGTATTCTCGAGAATACTTAGT<br>TTCCACATAGGTTTTTG   |
| sh-USP10#2-R | AATTCAAAAACCTATGTGGAAACTAAGTATTCTCGAGAATA<br>CTTAGTTTCCACATAGG   |

## sgRNA sequences

| Name     | Sequence (5'→3')     |
|----------|----------------------|
| sg-DCAF7 | GCGGCGACAAACAACGACGA |
| sg-USP10 | TCCATCGACTGCCAGTACCC |



siRNA sequence

| Name     | Sequence (5'→3')    |
|----------|---------------------|
| si-G3BP1 | CCCGTAAGAAGGAATGTTA |

Primers used for overexpression plasmid construction

| Name                | Primer (5'→3')                                                 |
|---------------------|----------------------------------------------------------------|
| Flag-DCAF7-F        | GGAATTCGCCACCATGTCCCTGCACGGCAAACGGA                            |
| Flag-DCAF7-R1       | ATCCTTGTAATCCACTCTGAGTATCTCCAGGC                               |
| Flag-DCAF7-R2       | GACTAGTCTACTTATCGTCGTCATCCTTGTAATCCACTC<br>TGA                 |
| Flag-G3BP1-F        | GGAATTCGCCACCATGGTGATGGAGAAGCCTAGTCCCC<br>TG                   |
| Flag-G3BP1-R1       | ATCCTTGTAATCCTGCCGTGGCGCA                                      |
| Flag-G3BP1-R2       | GACTAGTTCACTTATCGTCGTCATCCTTGTAATCCTG                          |
| Flag-G3BP1(K36R)-F  | CTGCATAGATTTTATGGAAGGAACTCTTCTTATGTCCAT<br>GGGGGA              |
| Flag-G3BP1(K36R)-R  | TCCCCCATGGACATAAGAAGAGTTCCTTCCATAAAATC<br>TATGCAG              |
| Flag-G3BP1(K76R)-F  | AACTTCACCAACTGCCACACCAGGATTCGCCATGTTGA<br>TGCTCAT              |
| Flag-G3BP1(K76R)-R  | ATGAGCATCAACATGGCGAATCCTGGTGTGGCAGTTGG<br>TGAAGTT              |
| Flag-G3BP1(K123R)-F | GCTCCTGAGGGGTCTGTTGCAAATAGATTCTATGTTCA<br>CAATGAT              |
| Flag-G3BP1(K123R)-R | ATCATTGTGAACATAGAATCTATTTGCAACAGACCCCTC<br>AGGAGC              |
| Myc-USP10-F1        | GGAATTCCATATGGCCACCATGGCCCTCCACAGCCCCGC<br>AGTATA              |
| Myc-USP10-F2        | TTTATGGGTGACATGCCCCGTCAGTTACGCCCAGGAC<br>TTGTAAC               |
| Myc-USP10-R1        | GTTACAAGTCCTGGGCGTAACTGACGGGGGCATGTCA<br>CCCATAAA              |
| Myc-USP10-R2        | GACTAGTTTACAGATCCTCTTCAGAGATGAGTTTCTGC<br>TCCAGCAGGTCCACTCGGCG |
| Myc-USP10(C424A)-F1 | GGAATTCCATATGGCCACCATGGCCCTCCACAGCCCCGC<br>AGTATA              |
| Myc-USP10(C424A)-F2 | GGAAGTGGGCTACATTAATGC                                          |
| Myc-USP10(C424A)-R1 | GCATTAATGTAGGCCCAGTTCC                                         |
| Myc-USP10(C424A)-R2 | GACTAGTTTACAGATCCTCTTCAGAGATGAGTTTCTGC<br>TCCAGCAGGTCCACTCGGCG |
